# Supplementary material
Source: Springer Nature journal article supplement (https://www.springermedizin.de/resource/supplementary/12875_2011_550_MOESM4_ESM.pdf/9434934)
Supplement: MOESM4 [file 9434934]

Potentially relevant citations screened for retrieval of full publication (n=5458)

Excluded citations based on title and abstract (n=5362)

Full publications retrieved for further evaluation (n=96)

Excluded publications (n=89):  
Age criterion (n=26)  
Hib vaccine coverage criterion (n=19)  
Relation duration of fever and SBI not studied (n=34)  
Retrospective design (n=5)  
Country of study is African, Asian, or South-American (n=3)  
Not an original study (n=2)

7 studies included in the current review
